# Supplementary material
Source: HighWire-hosted journal article supplement (https://erj.ersjournals.com/content/53/3/1801943)
Supplement: inline-supplementary-material-1 [file inline-supplementary-material-1.pdf]

## Online supplementary data

**Table S1. List and definition of variables included in the cluster analysis**

| Variable name                   | Variable definition in the French CF Registry                                    |
|---------------------------------|----------------------------------------------------------------------------------|
| Gender                          | Male/female                                                                      |
| Body mass index                 | Kg/m <sup>2</sup> , at the time of last visit of the year                        |
| Age                             | As per December 31th 2005                                                        |
| CFTR mutation class I, II, III  | 0, 1 or 2 alleles                                                                |
| CFTR mutation class IV, V       | 0, 1, or 2 alleles                                                               |
| CFTR mutations unclassified     | 0, 1 or 2 alleles                                                                |
| Liver Cirrhosis                 | Yes/No                                                                           |
| Pancreatic status               | Pancreatic insufficiency/Pancreatic sufficiency                                  |
| Haemoptysis                     | Any kind, yes/no                                                                 |
| Pneumothorax                    | Any, yes/no                                                                      |
| Diabetes mellitus treated       | Insulin and/or oral treatment                                                    |
| Diabetes mellitus (untreated)   | Diabetes, no treatment                                                           |
| FEV <sub>1</sub> , % predicted* | Last spirometry of the year                                                      |
| Surgical procedure              | Any surgical procedure in 2005 (excluding chest tube insertion for pneumothorax) |
| Intravenous antibiotics         | Number of courses in 2005                                                        |
| Hospitalisation                 | Number of hospitalization in 2005                                                |
| P. aeruginosa                   | Present/Absent**                                                                 |
| B. cepacia                      | Present/Absent                                                                   |
| Non tuberculous mycobacteria    | Present/Absent                                                                   |
| MSSA                            | Present/Absent                                                                   |
| MRSA                            | Present/Absent                                                                   |
| Long-term oxygen therapy        | Yes/no                                                                           |
| Non-invasive ventilation        | Yes/no                                                                           |
| Oral steroids                   | Prescribed for more than 3 months in 2005                                        |
| Azithromycin                    | Prescribed for more than 3 months in 2005                                        |

\* % predicted are based on equations by Knudson et al. [1]

\*\*At least one positive culture in the past 12 months

## Classification of CFTR mutations

Classification of CFTR mutations in the French CF registry was based on the functional classification by Welsh and Smith [2] and subsequent literature [3-5]. It included class I, II, III mutations and class IV or V mutations. When the functional consequences of a specific CFTR mutation was unknown, the mutation was considered unclassified. Uncomplete genotypes were genotypes with one or two unidentified CFTR mutations.

**Table S2. Classification of the main CFTR mutations (i.e., with frequencies  $\geq 0.3\%$  in the 2015 French CF Registry)**

| <b>Class I</b> | <b>Class II</b> | <b>Class III</b> | <b>Class IV</b> | <b>Class V</b> |
|----------------|-----------------|------------------|-----------------|----------------|
| W1282X         | F508del         | G551D            | D1152H          | 3849+10kbC>T   |
| W846X          | I507del         | G1244E           | R117H           | A445E          |
| R553X          | N1303K          | S1255P           | R117C           | 2789+5G>A      |
| R1162X         | L206W           | G1349D           | R334W           | 3120+1G>A      |
| R1066C         | G85E            | S945L            | R347H           |                |
| G542X          | S549N           | G551S            | R347P           |                |
| E60X           |                 | R560T            | R352Q           |                |
| E585X          |                 |                  | S1251N          |                |
| 711+1G>T       |                 |                  |                 |                |
| 621+1G>T       |                 |                  |                 |                |
| 394delTT       |                 |                  |                 |                |
| 3659delC       |                 |                  |                 |                |
| 2183AA>G       |                 |                  |                 |                |
| 1811+1.6kbAG   |                 |                  |                 |                |
| 1078delT       |                 |                  |                 |                |
| 1717-1G>A      |                 |                  |                 |                |

**Table S3. Characteristics of 1376 Canadian adults with CF in 2005.**

| Variable                      | Categories                       | Frequency / Median | % / IQR   |
|-------------------------------|----------------------------------|--------------------|-----------|
| <b>N</b>                      | Overall                          | 1,376              | 100.0%    |
| <b>Sex</b>                    | Female                           | 634                | 46.1%     |
|                               | Male                             | 742                | 53.9%     |
| <b>Age in 2005 (yrs)</b>      | Median (IQR)                     | 26.8               | 21.7-34.4 |
| <b>Genotype</b>               | Homozygous dF508                 | 669                | 48.6%     |
|                               | Heterozygous dF508               | 554                | 40.3%     |
|                               | Other                            | 146                | 10.6%     |
|                               | Missing                          | 7                  | 0.5%      |
| <b>BMI</b>                    | Median (IQR)                     | 21.6               | 19.8-24.0 |
| <b>FEV1 percent predicted</b> | Median (IQR)                     | 62.3               | 45.4-80.5 |
| <b>Negative Factors</b>       | BMI<17 kg/m <sup>2</sup>         | 41                 | 3.0%      |
|                               | FEV1<25% predicted               | 57                 | 4.1%      |
|                               | CF related diabetes              | 300                | 21.8%     |
|                               | Pneumothorax                     | 19                 | 1.4%      |
|                               | B. cepacia complex               | 200                | 14.5%     |
|                               | Long-term O <sub>2</sub> therapy | 81                 | 5.9%      |
| <b>Pancreatic Status</b>      | Pancreatic sufficient            | 171                | 12.4%     |
|                               | Pancreatic insufficient          | 1205               | 87.6%     |

**Table S4. Outcome by risk category in 1376 Canadian adults**

| Outcome               | 5-years                  |                     | 10-years                 |                     |
|-----------------------|--------------------------|---------------------|--------------------------|---------------------|
|                       | Not low risk<br>(N=1089) | Low Risk<br>(N=287) | Not low risk<br>(N=1089) | Low Risk<br>(N=287) |
| Any death             | 128 (11.8%)              | 9 (3.1%)            | 231 (21.2%)              | 22 (7.7%)           |
| Death w/o transplant  | 92 (8.4%)                | 6 (2.1%)            | 160 (14.7%)              | 15 (5.2%)           |
| Death post-transplant | 36 (3.3%)                | 3 (1.0%)            | 71 (6.5%)                | 7 (2.4%)            |
| Transplanted*         | 162 (14.9%)              | 13 (4.5%)           | 244 (22.4%)              | 25 (8.7%)           |
| Lost to follow-up     | 9 (0.8%)                 | 7 (2.4%)            | 76 (7.0%)                | 23 (8.0%)           |

### Classification and Regression Tree (CART) analysis

CART analysis was conducted in the French CF Registry cohort (n=1572 patients) using the Tanagra 1.4 (Lyon, France) software. As recommended in the software instruction, the analysis was first conducted in a learning set representing two third of the cohorts (n=1037). This set was split into a growing set (n=694) and a pruning set (n=343). The confusion matrix is presented below showing an error rate of 0.14, indicating that 86% (n=888) of the patients were allocated to the appropriate group (low risk vs. not low risk) using the CART-determined algorithm.

**Confusion matrix of the CART learning set in the French CF Registry cohort**

| Error rate        |        |             | 0,1437           |     |     |      |
|-------------------|--------|-------------|------------------|-----|-----|------|
| Values prediction |        |             | Confusion matrix |     |     |      |
| Value             | Recall | 1-Precision |                  | CL2 | CL1 | Sum  |
| CL2               | 0,9209 | 0,1416      | CL2              | 594 | 51  | 645  |
| CL1               | 0,7500 | 0,1478      | CL1              | 98  | 294 | 392  |
|                   |        |             | Sum              | 692 | 345 | 1037 |

Next the algorithm was tested in the remaining 535 patients (which data did not contribute to the construction of the algorithm). CART-determined algorithm allowed for classification of 87% of patients in the appropriate group (see below).

**Confusion matrix of the CART validation set in the French CF registry cohort**

| Error rate        |        |             | 0,1271           |     |     |     |
|-------------------|--------|-------------|------------------|-----|-----|-----|
| Values prediction |        |             | Confusion matrix |     |     |     |
| Value             | Recall | 1-Precision |                  | CL2 | CL1 | Sum |
| CL2               | 0,9268 | 0,1339      | CL2              | 291 | 23  | 314 |
| CL1               | 0,7964 | 0,1156      | CL1              | 45  | 176 | 221 |
|                   |        |             | Sum              | 336 | 199 | 535 |

**Table S5. Concordance of CART defined low-risk/not low risk classification with clusters**

| Cluster analysis         | CART analysis     |                        |
|--------------------------|-------------------|------------------------|
| Clusters                 | Low risk<br>n=515 | Not low risk<br>n=1057 |
| Cluster 1 (low risk)     | 35.5% (183) 70%   | 7.5% (79) 30%          |
| Cluster 2 (low risk)     | 52.2% (269) 77%   | 7.8% (82) 23%          |
| Cluster 3 (not low risk) | 12.2% (63) 9%     | 57.8% (611) 91%        |
| Cluster 4 (not low risk) | 0.0% (0)          | 6.8% (72)              |
| Cluster 5 (not low risk) | 0.0% (0)          | 11.8% (125)            |
| Cluster 6 (not low risk) | 0.0% (0)          | 3.5% (37)              |
| Cluster 7 (not low risk) | 0.0% (0)          | 4.8% (51)              |

This table can be simplified by examining the concordance between low risk/not low risk according to cluster vs. CART analysis:

**Table S6. Concordance of CART defined low-risk/not low risk vs. cluster-analysis defined low-risk/not low risk**

|                  |                            | CART analysis |              |             |
|------------------|----------------------------|---------------|--------------|-------------|
|                  |                            | Low risk      | Not low risk | Total       |
| Cluster analysis | Low risk (cluster 1-2)     | 452 (28.8%)   | 161 (10.2%)  | 613 (39.0%) |
|                  | Not low risk (cluster 3-7) | 63 (4.0%)     | 896 (57.0%)  | 959 (61.0%) |
|                  | Total                      | 515 (32.8%)   | 1057 (67.2%) | 1572 (100%) |

Based on this table, the following metrics can be calculated for CART analysis performance for classification of low risk/not low risk as defined by cluster analysis:

Sensitivity=87.8%, Specificity=84.8%

Positive predictive value (PPV)=73.7%; Negative predictive value 93.4%

**Figure S1. Dendrogram illustrating the results of the cluster analysis in 1572 adults with CF.** Subjects were classified using agglomerative hierarchical cluster analysis based on the main components identified by factor analysis for mixed data (FAMD, see Methods section). Each vertical line represents an individual subject and the length of vertical lines represents the degree of similarity between subjects. The horizontal line identify the cut-off for choosing the optimal number of clusters (n=7) in the data.

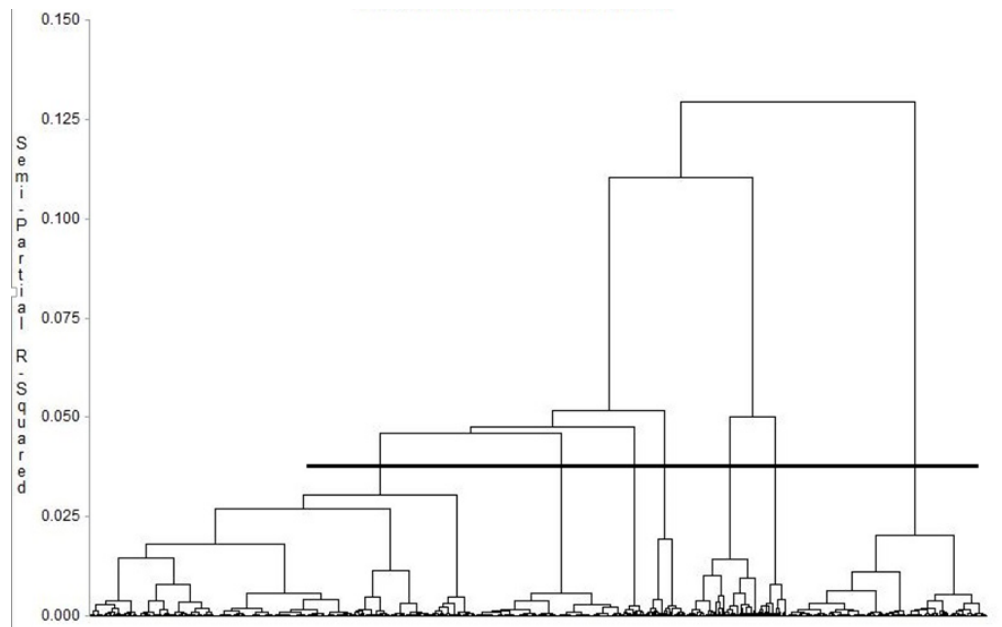

## References

1. Knudson RJ, Lebowitz MD, Holberg CJ, Burrows B. Changes in the normal maximal expiratory flow-volume curve with growth and aging. *Am Rev Respir Dis.* 1983;127:725-34. 10.1164/arrd.1983.127.6.725
2. Welsh MJ, Smith AE. Molecular mechanisms of CFTR chloride channel dysfunction in cystic fibrosis. *Cell.* 1993;73:1251-4. 10.1016/0092-8674(93)90353-r
3. Castellani C, Cuppens H, Macek MJ, et al. Consensus on the use and interpretation of cystic fibrosis mutation analysis in clinical practice. *J Cyst Fibros.* 2008;[Epub ahead of print].
4. Green DM, McDougal KE, Blackman SM, et al. Mutations that permit residual CFTR function delay acquisition of multiple respiratory pathogens in CF patients. *Respir Res.* 2010;11:140. 10.1186/1465-9921-11-140
5. McKone EF, Emerson SS, Edwards KL, Aitken ML. Effect of genotype on phenotype and mortality in cystic fibrosis: a retrospective cohort study. *Lancet.* 2003;361:1671-6.
